# Supplementary material for: Unfolding of α-helical 20-residue poly-glutamic acid analyzed by multiple runs of canonical molecular dynamics simulations
Source: PeerJ. 2018 May 15;6:e4769. doi: 10.7717/peerj.4769 (PMC5958886; doi:10.7717/peerj.4769)
Supplement: Supplemental Information 2 [file peerj-06-4769-s002.docx]

Table S2. Probabilities of helix folding and unfolding in *Sim* runs.

|  | All | *N**1 | *M**2 | *C**3 |
| --- | --- | --- | --- | --- |
|  | 0.96 | 0.97 | 0.98 | 0.92 |
|  | 0.29 | 0.31 | 0.24 | 0.30 |
|  | 0.09 | 0.07 | 0.09 | 0.30 |
|  | 0.26 | 0.15 | 0.24 | 0.29 |
|  | 0.04 | 0.03 | 0.04 | 0.05 |
|  | 0.07 | 0.02 | 0.11 | 0.06 |
|  | 0.02 | 0.02 | 0.01 | 0.02 |

*1 The N-terminal region consisting of the 2nd–7th residues. *2 The middle region consisting of the 8th–13th residues. *3 The C-terminal region consisting of the 14th–19th residues.
